# Supplementary material
Source: PubMed Central journal article supplement (PMC3975053)
Supplement: NIHMS562453-supplement-supplement_1.pdf [file NIHMS562453-supplement-supplement_1.pdf]

**eTable.** Use of acute care services among 250 older homeless subjects over 12 months

| Acute health services use                                        | All subjects (n=250) |
|------------------------------------------------------------------|----------------------|
| Emergency department visits                                      |                      |
| ≥1 emergency department visits, No. (%)                          | 160 (64.0)           |
| ≥4 emergency department visits, No. (%)                          | 71 (28.4)            |
| No. emergency department visits, mean (standard deviation)       | 4.6 (11.1)           |
| Emergency department visits at >1 hospital, No. (%) <sup>a</sup> | 53 (33.1)            |
| Emergency department discharge diagnosis, No. (%) <sup>b,c</sup> |                      |
| Injury <sup>d</sup>                                              | 70 (43.8)            |
| Musculoskeletal                                                  | 56 (35.0)            |
| Substance use-related <sup>e</sup>                               | 49 (30.6)            |
| Skin                                                             | 37 (23.1)            |
| Gastrointestinal                                                 | 36 (22.5)            |
| Respiratory                                                      | 34 (21.3)            |
| Patient left before seen by clinician                            | 28 (17.5)            |
| Psychiatric <sup>f</sup>                                         | 27 (16.9)            |
| Chest pain                                                       | 25 (15.6)            |
| Hospitalizations                                                 |                      |
| ≥1 hospitalizations, No. (%)                                     | 84 (33.6)            |
| No. hospitalizations, mean (standard deviation)                  | 1.0 (3.1)            |
| Hospitalization at >1 hospital, No. (%) <sup>a</sup>             | 17 (20.2)            |
| Length of stay, mean days (standard deviation)                   | 2.5 (2.3)            |
| Hospitalization discharge diagnosis, No. (%) <sup>b,c</sup>      |                      |
| Chest pain                                                       | 21 (25.0)            |
| Respiratory                                                      | 19 (22.6)            |
| Substance use-related <sup>e</sup>                               | 19 (22.6)            |
| Gastrointestinal                                                 | 17 (20.2)            |
| Injuries                                                         | 16 (19.1)            |
| Cardiovascular                                                   | 13 (15.5)            |

<sup>a</sup>Hospitals sharing an electronic medical record (member hospitals of Partners Healthcare and of the Veterans Affairs Boston Healthcare System) were categorized as a single site of care.

<sup>b</sup>Discharge diagnoses include both primary and secondary diagnoses, and therefore percentages do not sum to 100%.

<sup>c</sup>Emergency department and hospitalization discharge diagnoses were categorized using codes from the International Classification of Diseases, Ninth Revision (ICD-9).

<sup>d</sup>ICD-9 codes 800-959 and 990-999.

<sup>e</sup>Diagnoses related to alcohol or drug intoxication, withdrawal, abuse, or dependence (ICD-9 codes 291-292, 303-305, 790.3, 962, 965, 967- 971, 977, 980, V11.3, V79.1).

<sup>f</sup>ICD-9 codes 290, 293-302, and 306-319.
